# Supplementary material for: Feature importance network reveals novel functional relationships between biological features in Arabidopsis thaliana
Source: Frontiers journal article supplement (doi:10.3389/fpls.2022.944992), 2022-09-23
Supplement: Data_Sheet_1.zip [file Data_Sheet_1.zip]

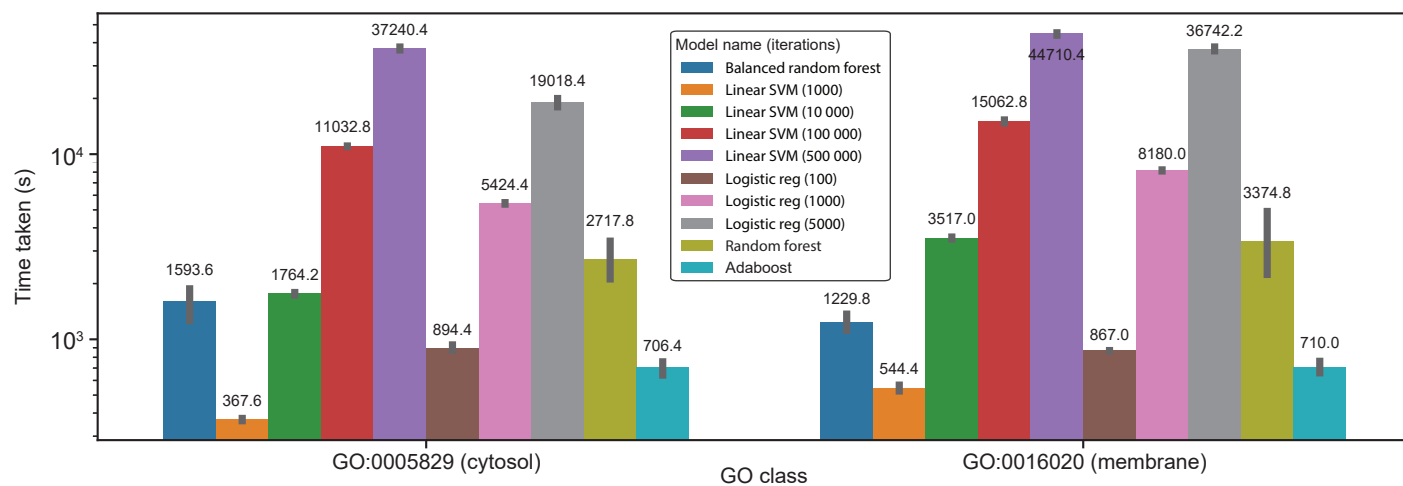

**Figure S1. Shows time taken for each individual GO class.** Time trial repeat - running all machine learning models on 2 GO classes, 5 repeats per model, to allow for all models to be compared on a common basis.

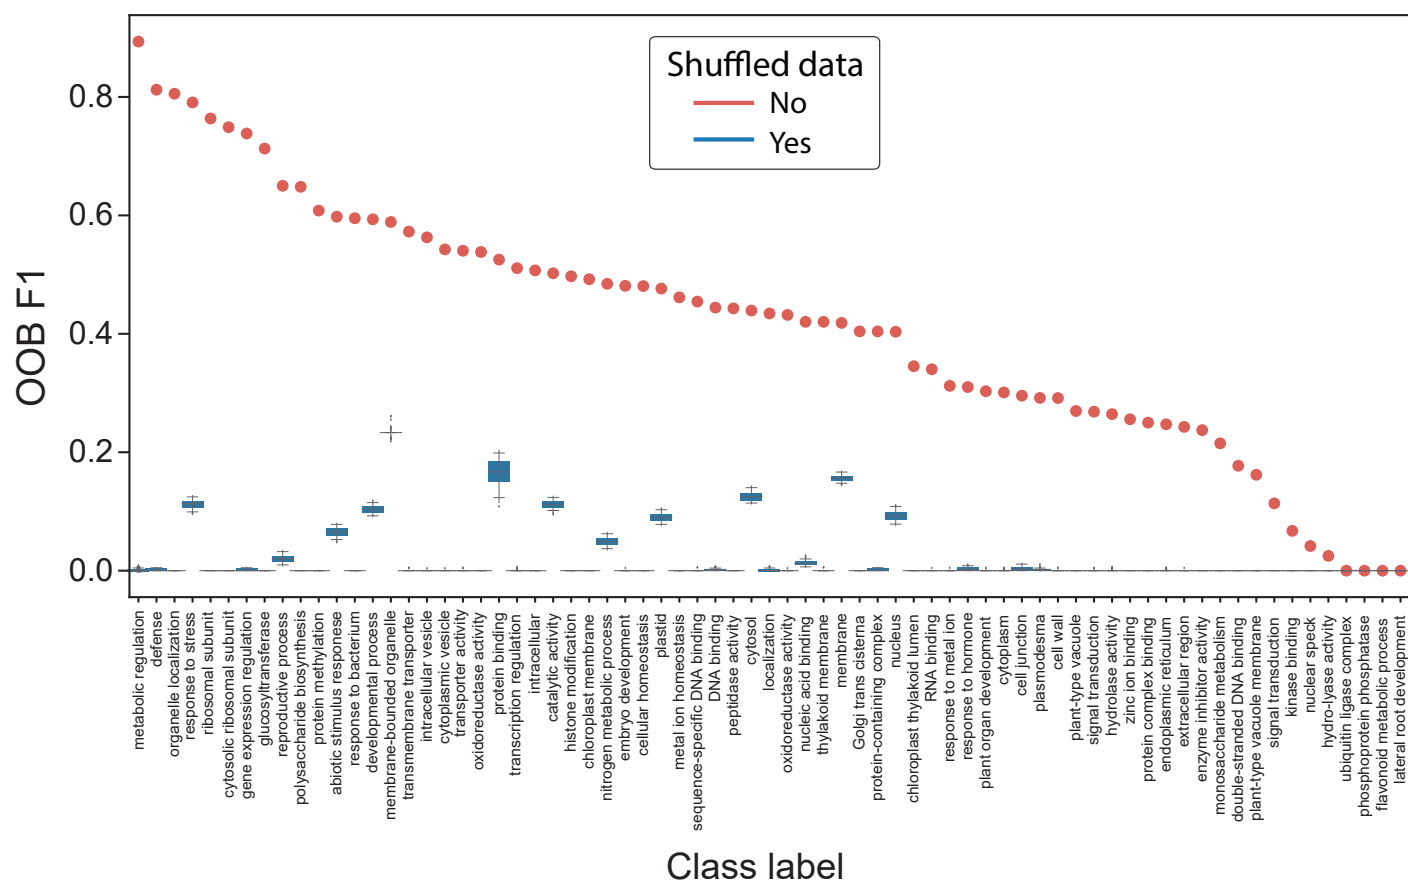

**Figure S2. Random forest OOB scores when trained on shuffled data (blue) or actual data (orange).** Some GO term descriptions have been summarised to save space, full descriptions are given in Table S9.

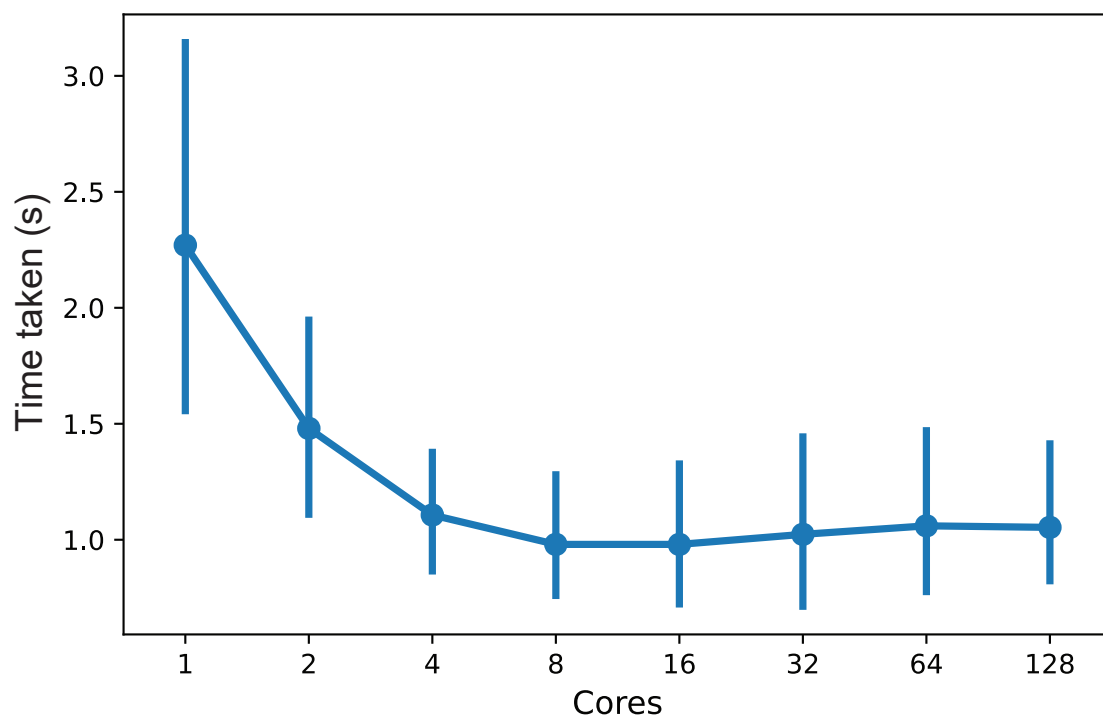

**Figure S3.** Line plot showing time taken to train random forest models on 5 GO classes, GO:0043229 (intracellular organelle), GO:0005774 (vacuolar membrane), GO:0048827 (phyllome development), GO:0030001 (metal ion transport) and GO:0016836 (hydro-lyase activity).

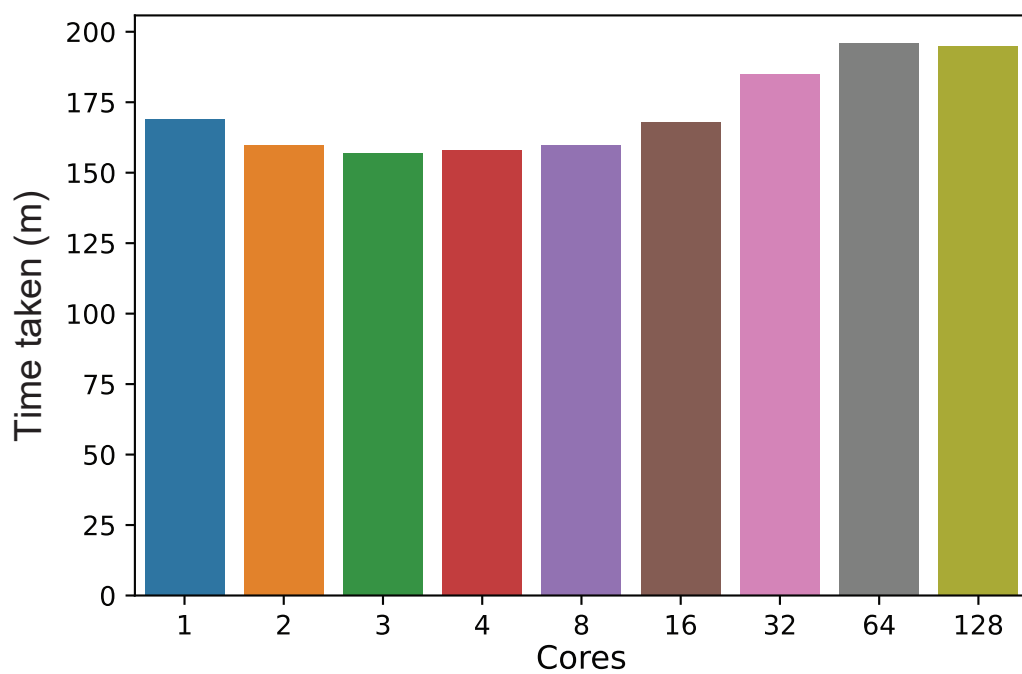

**Figure S4. Bar graph showing time taken to train random forest models on all GO classes.**

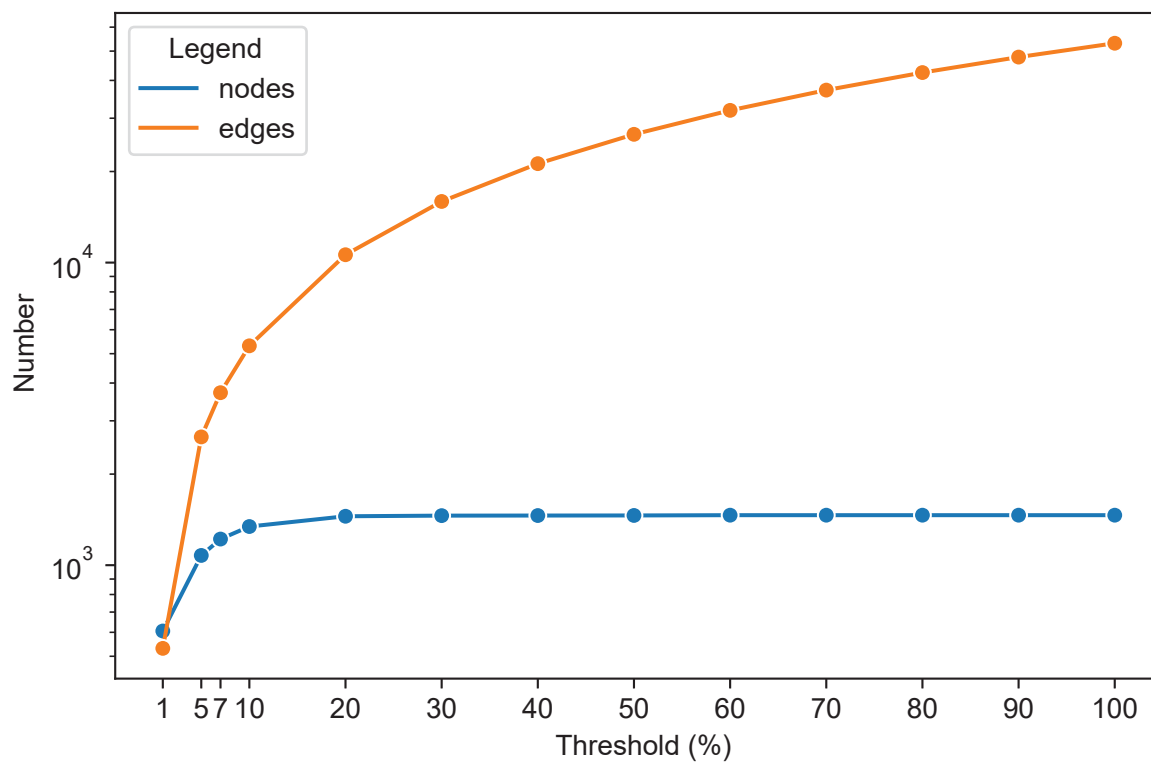

**Figure S5. Line plot showing the number of nodes and edges in the feature importance network (FIN) after applying different mutual rank thresholds.** These thresholds are the top X% of mutual ranks (feature pairs, otherwise known as edges) selected from the FIN.
